# Supplementary material for: Online Yoga Instruction Improves Resilience in Athletes During the COVID -19 Pandemic
Source: Preprints.org preprint supplement (doi:10.20944/preprints202208.0549.v1), 2022-08-31
Supplement: Supplementary file 1 [file supplementary]

**The Sports Mind Inventory**  
**By**  
**N.A. Dewan, M.D.**

Number \_\_\_\_\_

Age \_\_\_\_\_

Gender \_\_\_\_\_

Primary Sport \_\_\_\_\_

**If I am or my team is losing while I am competing in a sport, I tend to:**

|                                               | <b>Strongly<br/>Disagree</b> | <b>Disagree</b> | <b>Neither</b> | <b>Agree</b> | <b>Strongly<br/>Agree</b> |
|-----------------------------------------------|------------------------------|-----------------|----------------|--------------|---------------------------|
| 1. Blame myself                               | 1                            | 2               | 3              | 4            | 5                         |
| 2. Look only at the negative side of things   | 1                            | 2               | 3              | 4            | 5                         |
| 3. Try not to think about it                  | 1                            | 2               | 3              | 4            | 5                         |
| 4. Tell myself, I can comeback no matter what | 1                            | 2               | 3              | 4            | 5                         |
| 5. Get upset and emotional                    | 1                            | 2               | 3              | 4            | 5                         |
| 6. Start giving up                            | 1                            | 2               | 3              | 4            | 5                         |

**When I am competing in a sport:**

|                                                                                                         | <b>Strongly<br/>Disagree</b> | <b>Disagree</b> | <b>Neither</b> | <b>Agree</b> | <b>Strongly<br/>Agree</b> |
|---------------------------------------------------------------------------------------------------------|------------------------------|-----------------|----------------|--------------|---------------------------|
| 7. I enjoy playing the sport even though I may not always win                                           | 1                            | 2               | 3              | 4            | 5                         |
| 8. I stay focused                                                                                       | 1                            | 2               | 3              | 4            | 5                         |
| 9. I use breathing techniques to keep calm and focused                                                  | 1                            | 2               | 3              | 4            | 5                         |
| 10. I tend to recover from my mistakes fast                                                             | 1                            | 2               | 3              | 4            | 5                         |
| 11. I am smart about how to win                                                                         | 1                            | 2               | 3              | 4            | 5                         |
| 12. When I am done with a particular competition or event, I usually know what to work on to get better | 1                            | 2               | 3              | 4            | 5                         |

|                                                                             |   |   |   |   |   |
|-----------------------------------------------------------------------------|---|---|---|---|---|
| 13. I feel good/confident about myself regardless if I am winning or losing | 1 | 2 | 3 | 4 | 5 |
| 14. I can get intense at the right moments                                  | 1 | 2 | 3 | 4 | 5 |
| 15. I fight hard to win and do the best I can                               | 1 | 2 | 3 | 4 | 5 |

## The Sports Mind Inventory

(Continued)

In general, I believe that:

|                                                                | Strongly Disagree | Disagree | Neither | Agree | Strongly Agree |
|----------------------------------------------------------------|-------------------|----------|---------|-------|----------------|
| 16. I have a purpose in life                                   | 1                 | 2        | 3       | 4     | 5              |
| 17. I can talk to almost anyone                                | 1                 | 2        | 3       | 4     | 5              |
| 18. I fit in well with others                                  | 1                 | 2        | 3       | 4     | 5              |
| 19. I am pretty flexible and can adapt to stressful situations | 1                 | 2        | 3       | 4     | 5              |
| 20. I have control over things in my life                      | 1                 | 2        | 3       | 4     | 5              |
| 21. I can figure things out when I have a problem              | 1                 | 2        | 3       | 4     | 5              |
| 22. I can do things on my own if I have to                     | 1                 | 2        | 3       | 4     | 5              |
| 23. I am in excellent physical shape for my sport              | 1                 | 2        | 3       | 4     | 5              |
| 24. I have strong fundamental skills in my sport               | 1                 | 2        | 3       | 4     | 5              |
